# Supplementary material for: Microbial community response to a decade of simulated global changes depends on the plant community
Source: Oxford University Press journal article supplement (doi:10.1525/elementa.2021.00124), 2021-01-01
Supplement: finks_etal_2020.supplementary_r2.docx [file finks_etal_2020.supplementary_r2.docx]

**Supplemental Materials**

**Microbial community response**

**to a decade of simulated global changes depends on the plant community**

Sarai S. Finks1, Claudia Weihe1, Sarah Kimball2, Steven D. Allison1, Adam C. Martiny1,3, Kathleen K. Treseder1, Jennifer B.H. Martiny1

1Department of Ecology and Evolutionary Biology, University of California, Irvine, CA, USA

2Center for Environmental Biology, University of California, Irvine, CA, USA

3Department of Earth System Science, University of California, Irvine, CA, USA

Corresponding author’s email: [sfinks@uci.edu](mailto:sfinks@uci.edu)

**List of Contents:**

**Figure S1**. **Aerial view of Loma Ridge research site and close up of rain shelters atop drought plots**. (A) Satellite image of the LRGCE site in the Santa Ana Mountains, within the Irvine Ranch National Landmark in Orange County, California, USA, showing the smaller plots in the annual grassland and the larger, adjacent plots in the CSS, bar scale in bottom left for reference. Crosshatching indicates the area of a February 2007 control burn (note: all plots burned soon after in the Santiago wildfire, see Kimball et al., 2014). Plots are color coded by water treatment, with red indicating reduced rainfall (drought), green for ambient rainfall, and blue for added water (not included in this study). Thick dashed lines indicate water collection pipelines, and solid black lines indicate water distribution pipelines. The black-outlined polygons indicate blocks containing all treatment combinations. Each plot (rectangle) was divided in half lengthwise, and nitrogen treatments (ambient or added) were randomly assigned. (B and C) Image of rain shelters in grassland plots uncovered and covered, respectively.

**Figure S2**. **Precipitation in the Loma Ridge plots over 4.5 years of a decade long experiment.** The green lines denote precipitation that fell only in the ambient (control) plots as it was blocked from the drought (reduced rainfall) plots. Plant survey and litter sample collection dates are marked by red arrows.

**Figure S3. Microbial communities are impacted by seasonal variation.** Non-metric multidimensional scaling (NMDS) ordination depicting (A) bacterial (B) fungal community composition. Symbols are defined in the legend in panel (A). Centroids are twice the size of sample points. Pairwise PERMANOVAs between microbial communities from sample collection dates coinciding with peak wet (January-March) and dry (June-September) seasons were significantly different *P <* 0.01.

**Table S1. Summary of bacterial and fungal community sequencing.**

**Table S2. Number of microbial and plant samples included in study after rarefaction.**

**Table S3. Bacterial and fungal taxa that each contribute to at least 1% of the compositional differences between the treatments by ecosystem.**

**Figure S1**. **Aerial view of Loma Ridge research site and close up of rain shelters atop drought plots**. (A) Satellite image of the LRGCE site in the Santa Ana Mountains, within the Irvine Ranch National Landmark in Orange County, California, USA, showing the smaller plots in the annual grassland and the larger, adjacent plots in the CSS, bar scale in bottom left for reference. Crosshatching indicates the area of a February 2007 control burn (note: all plots burned soon after in the Santiago wildfire, see Kimball et al., 2014). Plots are color coded by water treatment, with red indicating reduced rainfall (drought), green for ambient rainfall, and blue for added water (not included in this study). Thick dashed lines indicate water collection pipelines, and solid black lines indicate water distribution pipelines. The black-outlined polygons indicate blocks containing all treatment combinations. Each plot (rectangle) was divided in half lengthwise, and nitrogen treatments (ambient or added) were randomly assigned. (B and C) Image of rain shelters in grassland plots uncovered and covered, respectively.

**Figure S2**. **Precipitation in the Loma Ridge plots over 4.5 years of a decade long experiment.** The green lines denote precipitation that fell only in the ambient (control) plots as it was blocked from the drought (reduced rainfall) plots. Plant survey and litter sample collection dates are marked by red arrows.

**Figure S3. Microbial communities are impacted by seasonal variation.** Non-metric multidimensional scaling (NMDS) ordination depicting (A) bacterial (B) fungal community composition. Symbols are defined in the legend in panel (A). Centroids are twice the size of sample points. Pairwise PERMANOVAs between microbial communities from sample collection dates coinciding with peak wet (January-March) and dry (June-September) seasons were significantly different *P <* 0.01.

**Note**: Taxa (OTUs, operational taxonomic units) identified using a one-way SIMPER analysis for significant factors identified by the PERMANOVA tests (Table S2). For each factor, the average abundance of the top OTUs increases (+) or decreases (−) in the treatment relative to the ambient plots and the OTUs percent contribution (%) to the compositional differences between reduced water or added nitrogen inputs and ambient conditions.

**np** = not present in sample.

*Nitrogen treatments were not significant for fungal communities however trends in fungal taxa are reported.

**Note**: Taxa (OTUs, operational taxonomic units) identified using a one-way SIMPER analysis for significant factors identified by the PERMANOVA tests (Table S2). For each factor, the average abundance of the top OTUs increases (+) or decreases (−) in the treatment relative to the ambient plots and the OTUs percent contribution (%) to the compositional differences between reduced water or added nitrogen inputs and ambient conditions.

**np** = not present in sample.

*Nitrogen treatments were not significant for fungal communities however trends in fungal taxa are reported.

**Note**: Taxa (OTUs, operational taxonomic units) identified using a one-way SIMPER analysis for significant factors identified by the PERMANOVA tests (Table S2). For each factor, the average abundance of the top OTUs increases (+) or decreases (−) in the treatment relative to the ambient plots and the OTUs percent contribution (%) to the compositional differences between reduced water or added nitrogen inputs and ambient conditions.

**np** = not present in sample.

*Nitrogen treatments were not significant for fungal communities however trends in fungal taxa are reported.

**Note**: Taxa (OTUs, operational taxonomic units) identified using a one-way SIMPER analysis for significant factors identified by the PERMANOVA tests (Table S2). For each factor, the average abundance of the top OTUs increases (+) or decreases (−) in the treatment relative to the ambient plots and the OTUs percent contribution (%) to the compositional differences between reduced water or added nitrogen inputs and ambient conditions.

**np** = not present in sample.

*Nitrogen treatments were not significant for fungal communities however trends in fungal taxa are reported.

**Note**: Taxa (OTUs, operational taxonomic units) identified using a one-way SIMPER analysis for significant factors identified by the PERMANOVA tests (Table S2). For each factor, the average abundance of the top OTUs increases (+) or decreases (−) in the treatment relative to the ambient plots and the OTUs percent contribution (%) to the compositional differences between reduced water input or added nitrogen and ambient conditions.

**np** = not present in sample.
